# Supplementary material
Source: publisher figshare collection journal article supplement (https://gsapubs.figshare.com/ndownloader/files/22757477)
Supplement: Supplementary file 1 [file 22757477]

Data Repository material to “How stable is the Mississippi Delta?” by T.E. Törnqvist, S.J. Bick, K. van der Borg, and A.F.M. de Jong

## ***CROSS SECTIONS***

The basal-peat samples from the southwestern Mississippi Delta were obtained from four cross sections (three from the Bayou Cypremort area, one from the Bayou Sale area). Locations of the cross sections are shown in Figure DR1. The Pleistocene basement in this area consists of Peoria Loess, typically a few meters in thickness, and in turn overlying the highly consolidated Prairie Complex (Autin et al., 1991).

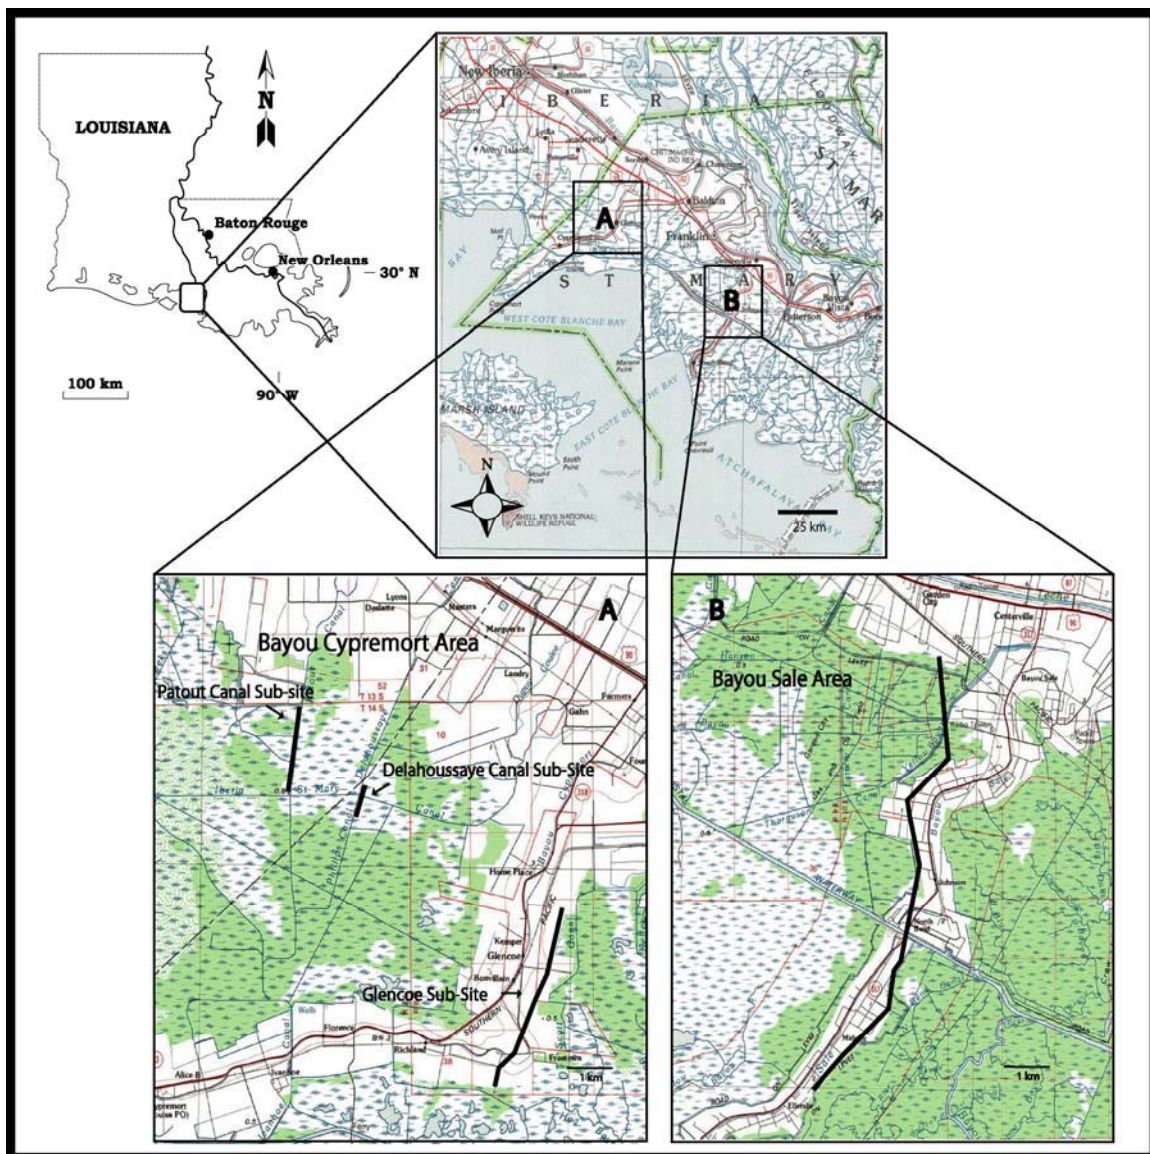

*Figure DR1*

The Bayou Sale cross section (Fig. DR2) shows a dipping Pleistocene basement capped by a weakly developed paleosol consisting of a dark gray A-horizon (cf. Törnqvist et al., 2004a). The Holocene succession is predominantly clastic, consisting primarily of silty overbank facies of Bayou Sale and possibly older distributaries. The deepest part of the clastic unit contains bivalves of *Rangia cuneata*, indicating deposition in a brackish, lagoonal environment. A basal peat bed is encountered at depths >11 m below MSL; three  $^{14}\text{C}$  samples were obtained in a vertical range of ~3 m.

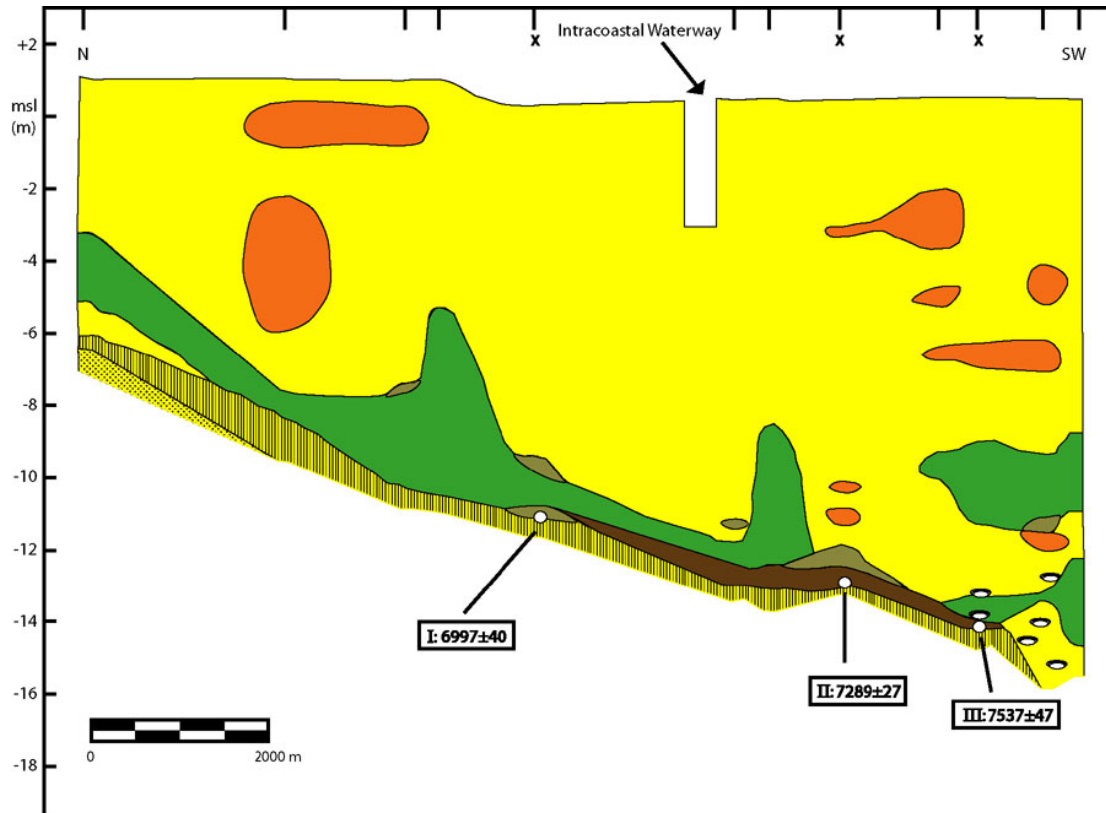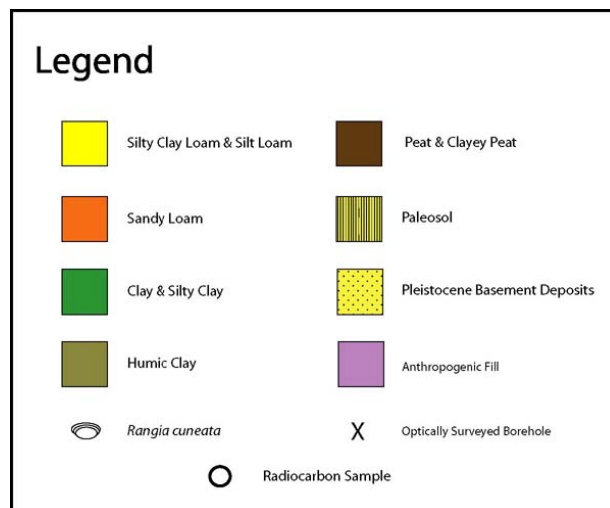

Figure DR2

The Glencoe cross section (Fig. DR3) is located in the southeastern part of the Bayou Cypremort area where the Pleistocene basement is the deepest. Basal peat is found nearly throughout this cross section on top of an undulating Pleistocene surface; the deepest peat occurrences are overlain by lagoonal facies. The three  $^{14}\text{C}$  samples cover a depth range from  $\sim 10$  to  $\sim 5$  m below MSL and track about 2000  $^{14}\text{C}$  yr of RSL rise.

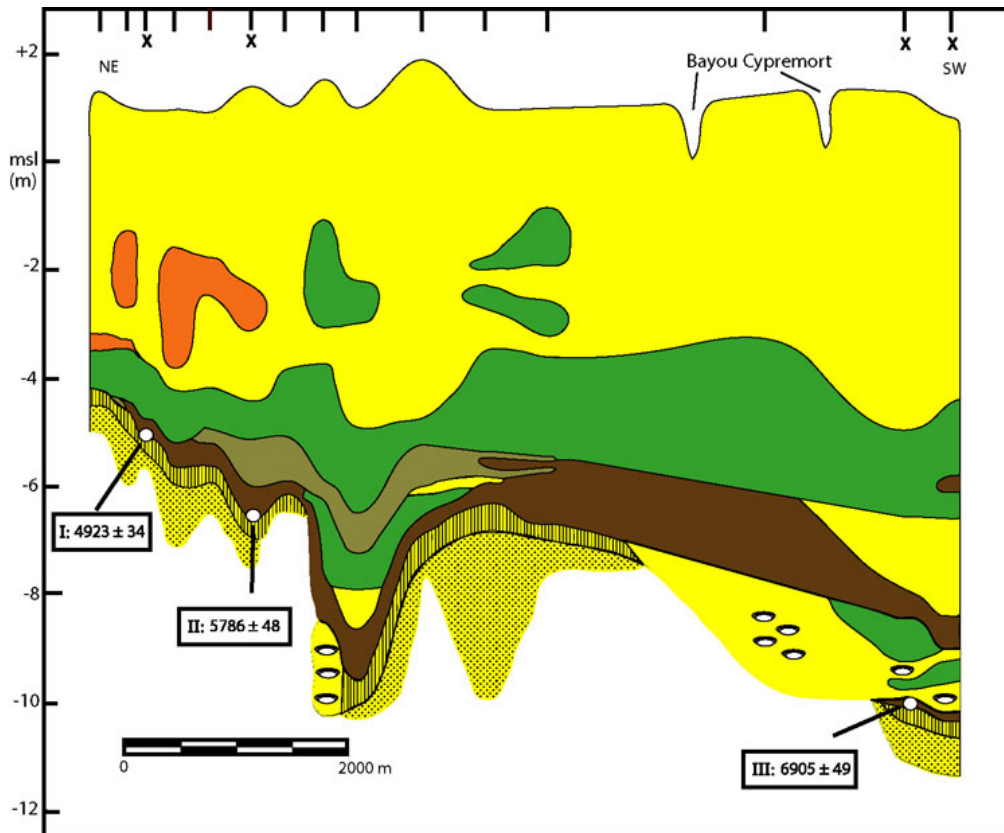

Figure DR3

The Delahoussaye Canal cross section (Fig. DR4) shows a gently dipping Pleistocene basement, mostly onlapped by a highly consolidated, clayey to silty overbank deposit that is capped by an A-horizon similar to the one found at the top of the Pleistocene basement. The clastic Holocene unit is most likely an overbank deposit of Bayou Teche, the trunk channel belt of the Teche subdelta. Basal peat resting on the Pleistocene is only found in the deepest part of the cross section and pinches out under the Teche overbank deposit. The uppermost of the two  $^{14}\text{C}$  samples not only provides a sea-level index point, but also constrains the maximum age of the Teche subdelta. Its  $^{14}\text{C}$  age ( $4419 \pm 42$  yr B.P.) is considerably younger than the widely used age of Frazier (1967) of  $\sim 5700$  yr B.P., suggesting that the Teche subdelta age has been overestimated by more than 1000  $^{14}\text{C}$  yr (cf. Törnqvist et al., 1996).

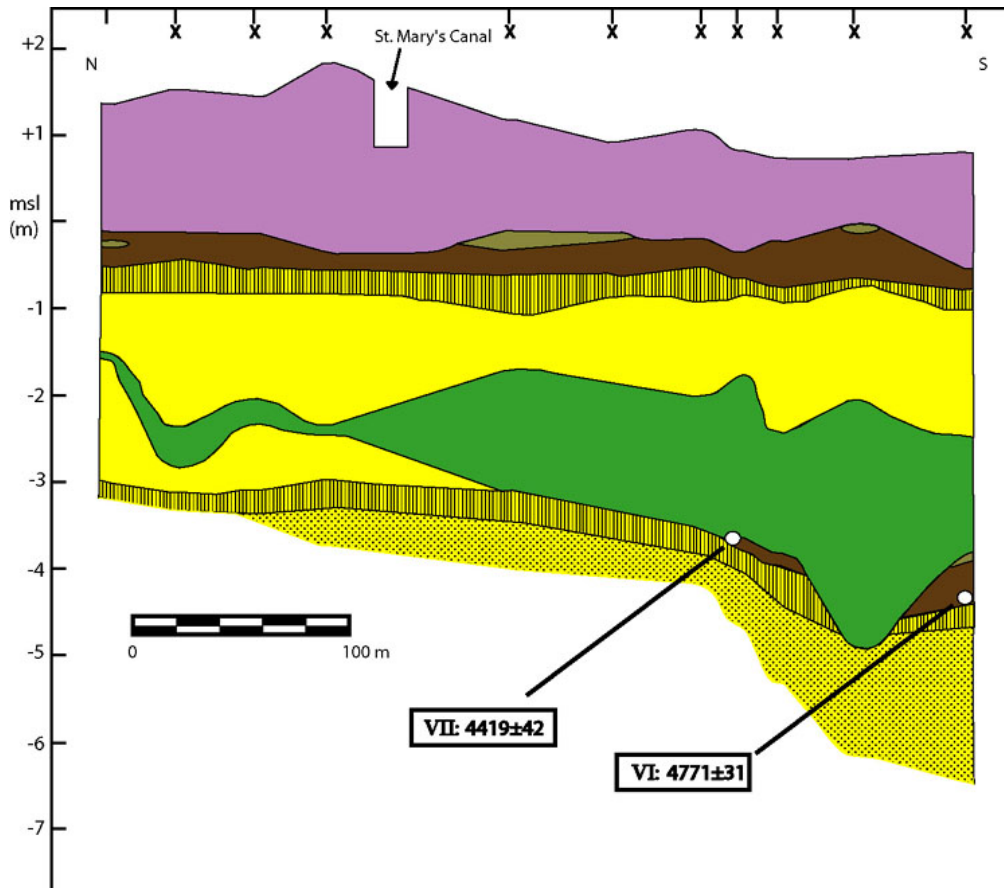

Figure DR4

The Patout Canal cross section (Fig. DR5) shows a stratigraphy very similar to that in the Delahoussaye Canal area, but no basal peat is found immediately overlying the Pleistocene basement. However, a laterally extensive peat bed buries the overbank strata of Bayou Teche and rests on a similar paleosol. The Teche deposit is extremely consolidated, indicating that compaction of this unit after peat onlap has been negligible. Three  $^{14}\text{C}$  samples track RSL rise through the uppermost meter into the present. The robustness of these data is indicated by the shallowest sample that is nearly modern in age and is located near present MSL.

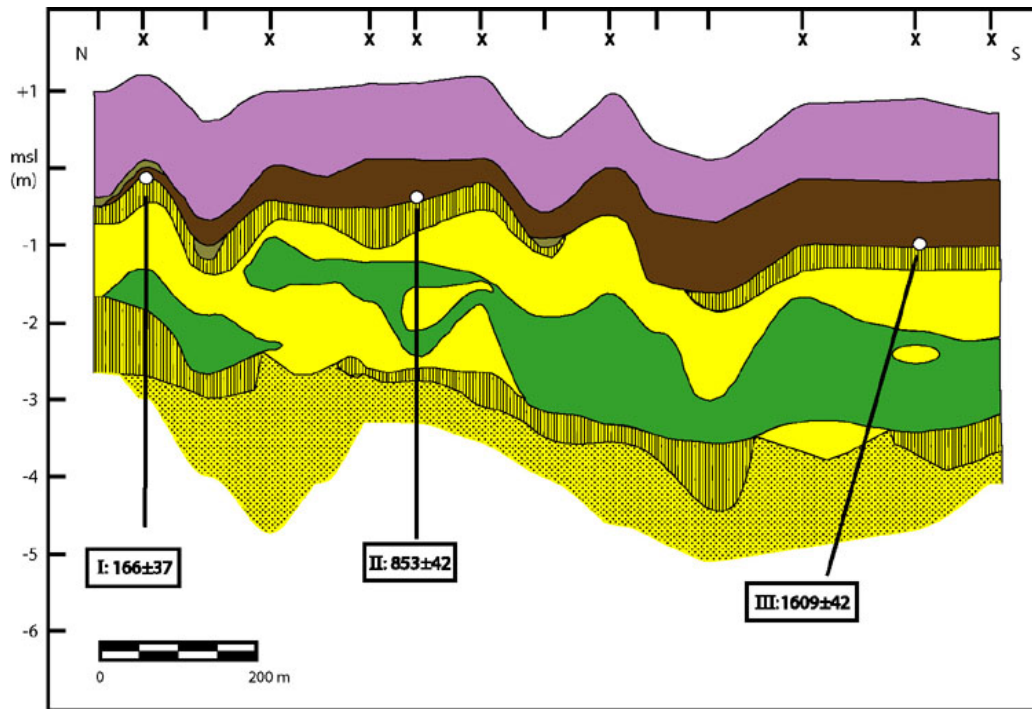

Figure DR5



**RADIOCARBON DATA***Table DRI*

| Sample name              | UTM-coordinate (N) | UTM-coordinate (E) | Surface elevation (m) | Depth below surface (cm) | Material dated                         | $\delta^{13}\text{C}_{\text{PDB}}$ (‰) | Age ( $^{14}\text{C}$ yr B.P.) | Lab number |
|--------------------------|--------------------|--------------------|-----------------------|--------------------------|----------------------------------------|----------------------------------------|--------------------------------|------------|
| Patout Canal I-1         | 3302.960           | 622.520            | 1.20                  | 129-133                  | 5 Cyperaceae achenes                   | -25.4                                  | 166 ± 37                       | UtC-12115  |
| Patout Canal II-1        | 3302.620           | 622.480            | 1.09                  | 146-150                  | 9 <i>Scirpus</i> spp. achenes          | -27.1                                  | 853 ± 42                       | UtC-12101  |
| Patout Canal III-1       | 3302.000           | 622.380            | 0.92                  | 189-193                  | 4 charcoal fragments                   | -25.5                                  | 1609 ± 42                      | UtC-12102  |
| Delahoussaye Canal VI-1a | 3301.600           | 624.180            | 0.84                  | 513-517                  | 4 <i>Polygonum</i> spp. achenes        | -27.3                                  | 4661 ± 46 <sup>†</sup>         | UtC-12503  |
| Delahoussaye Canal VI-1b | 3301.600           | 624.180            | 0.84                  | 513-517                  | >10 charcoal fragments                 | -12.0                                  | 4867 ± 43 <sup>†</sup>         | UtC-12504  |
| Delahoussaye Canal VII-1 | 3301.720           | 624.230            | 0.85                  | 452-454                  | 1 charcoal fragment                    | -26.2                                  | 4419 ± 42                      | UtC-13281  |
| Glencoe I-1              | 3298.040           | 629.680            | 0.91                  | 587-591                  | 25 <i>Scirpus</i> spp. achenes         | -25.7                                  | 4923 ± 34                      | UtC-12103  |
| Glencoe II-1             | 3298.340           | 629.500            | 1.44                  | 798-802                  | 20 <i>Scirpus</i> spp. achenes         | -25.5                                  | 5786 ± 48                      | UtC-12104  |
| Glencoe III-1a           | 3295.080           | 628.060            | 1.34                  | 1131-1135                | 11 <i>Scirpus</i> spp. achenes         | -25.7                                  | 6934 ± 84 <sup>†</sup>         | UtC-12116  |
| Glencoe III-1b           | 3295.080           | 628.060            | 1.34                  | 1131-1135                | 3 charcoal fragments                   | -17.0                                  | 6890 ± 60 <sup>†</sup>         | UtC-12105  |
| Bayou Sale I-1           | 3286.280           | 648.320            | 0.27                  | 1156-1158                | 15 <i>Carex peryginum</i> type achenes | -26.7                                  | 6997 ± 40                      | UtC-12505  |
| Bayou Sale II-1a         | 3282.340           | 647.520            | 0.48                  | 1353-1355                | 2 charcoal fragments                   | -21.6                                  | 7480 ± 110 <sup>†</sup>        | UtC-12506  |
| Bayou Sale II-1b         | 3282.340           | 647.520            | 0.48                  | 1353-1355                | 5 charcoal fragments                   | -18.3                                  | 7265 ± 32 <sup>†</sup>         | UtC-12487  |
| Bayou Sale II-2          | 3282.340           | 647.520            | 0.48                  | 1350-1353                | 15 <i>Scirpus</i> spp. achenes         | -27.9                                  | 7317 ± 60 <sup>†</sup>         | UtC-12872  |
| Bayou Sale III-1a        | 3281.100           | 646.080            | 0.48                  | 1474-1476                | 11 <i>Scirpus</i> spp. achenes         | -26.3                                  | 7830 ± 60 <sup>†</sup>         | UtC-12488  |
| Bayou Sale III-1b        | 3281.100           | 646.080            | 0.48                  | 1474-1476                | 1 charcoal fragment                    | -13.0                                  | 7537 ± 47                      | UtC-12507  |

<sup>†</sup>Weighted mean ages for Delahoussaye Canal VI-1: 4771 ± 31; Glencoe III-1: 6905 ± 49; Bayou Sale II-1/2: 7289 ± 27

<sup>‡</sup>Rejected (see Törnqvist et al., 2004b)

**REFERENCES CITED**

- Autin, W.J., Burns, S.F., Miller, B.J., Saucier, R.T., and Snead, J.I., 1991, Quaternary geology of the Lower Mississippi Valley, *in* Morrison, R.B., ed., Quaternary nonglacial geology: Conterminous U.S: Geological Society of America, The Geology of North America, v. K-2, p. 547-582.
- Frazier, D.E., 1967, Recent deltaic deposits of the Mississippi River: their development and chronology. Gulf Coast Association of Geological Societies Transactions, v. 17, p. 287-311.
- Törnqvist, T.E., Kidder, T.R., Autin, W.J., Van der Borg, K., De Jong, A.F.M., Klerks, C.J.W., Snijders, E.M.A., Storms, J.E.A., Van Dam, R.L., and Wiemann, M.C., 1996, A revised chronology for Mississippi River subdeltas: Science, v. 273, p. 1693-1696.
- Törnqvist, T.E., González, J.L., Newsom, L.A., Van der Borg, K., De Jong, A.F.M. and Kurnik, C.W., 2004a, Deciphering Holocene sea-level history on the U.S. Gulf Coast: A high-resolution record from the Mississippi Delta: Geological Society of America Bulletin, v. 116, p. 1026-1039.
- Törnqvist, T.E., Bick, S.J., González, J.L., Van der Borg, K., and De Jong, A.F.M., 2004b, Tracking the sea-level signature of the 8.2 ka cooling event: New constraints from the Mississippi Delta: Geophysical Research Letters, v. 31, L23309, doi:10.1029/2004GL021429.
